# Supplementary material for: Efficient dye-sensitized solar cells with broad absorption and enhanced photo-current generation
Source: Royal Society of Chemistry journal article supplement (doi:10.1039/c6ra06247d), 2016-01-01

## Supplementary Information

### Efficient Dye-Sensitized Solar Cells with Broad Absorption and Enhanced Photo-current Generation

*Jihun Kim<sup>†</sup>, Horim Lee<sup>†</sup>, Dong Young Kim, and Yongsok Seo\**

#### SI 1. NMR spectroscopy of compounds (7), (8), and (9)

*4-(3-hexyl-5-(5-(4-hexylthiophen-2-yl)thieno[3,2-b]thiophen-2-yl)thiophen-2-yl)-N,N-bis(4-methoxyphenyl)aniline (7)*

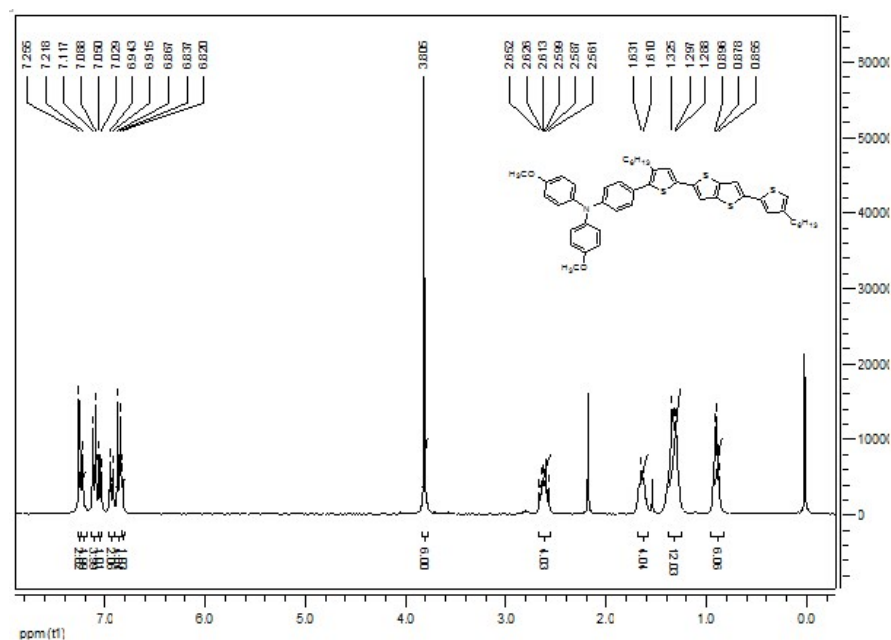



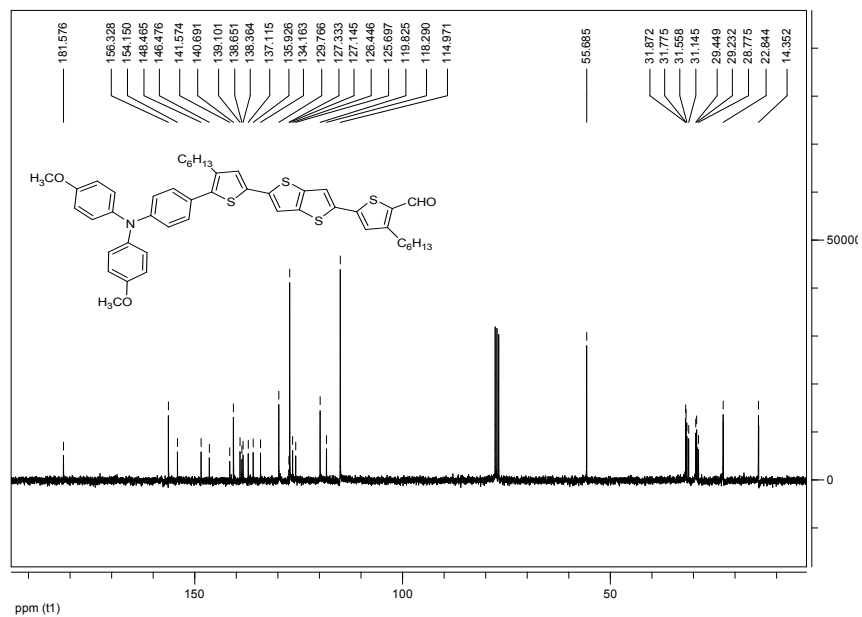

**3-(5-(5-(5-(4-(bis(4-methoxyphenyl)amino)phenyl)-4-hexylthiophen-2-yl)thieno[3,2-b]thiophen-2-yl)-3-hexylthiophen-2-yl)-2-cyanoacrylic acid (9)**

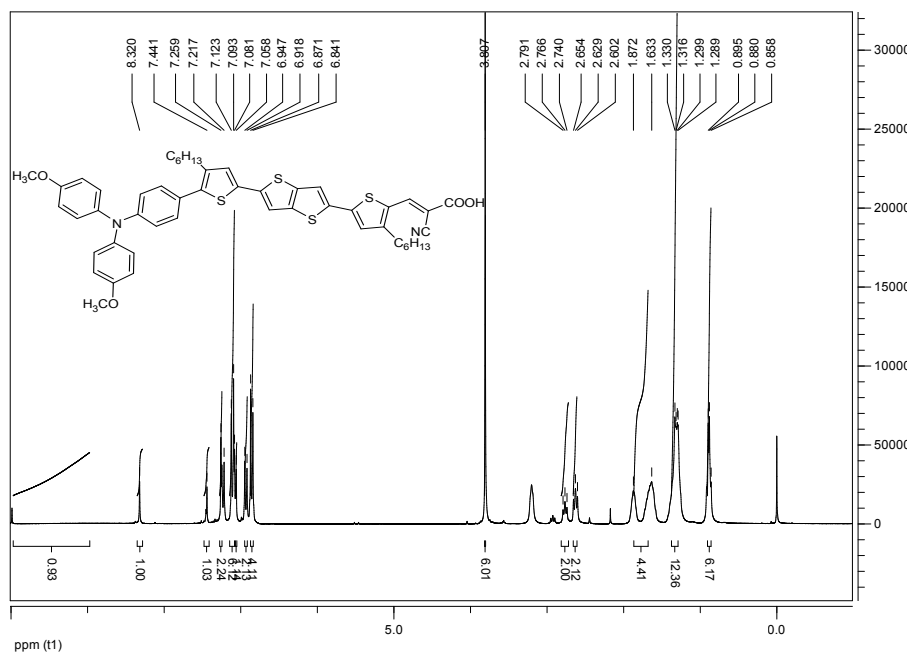

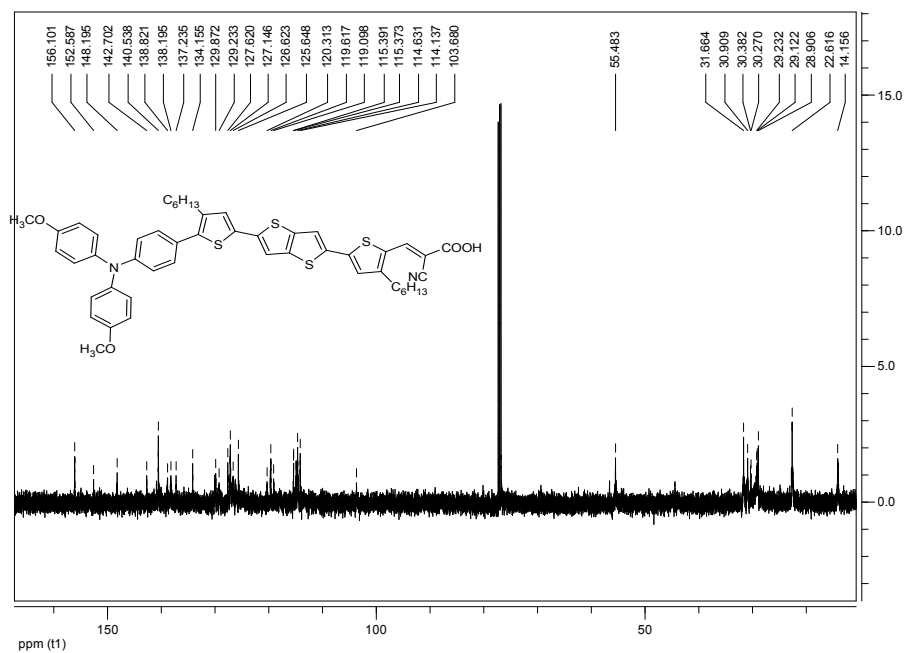

## SI 2. Cyclic voltammogram

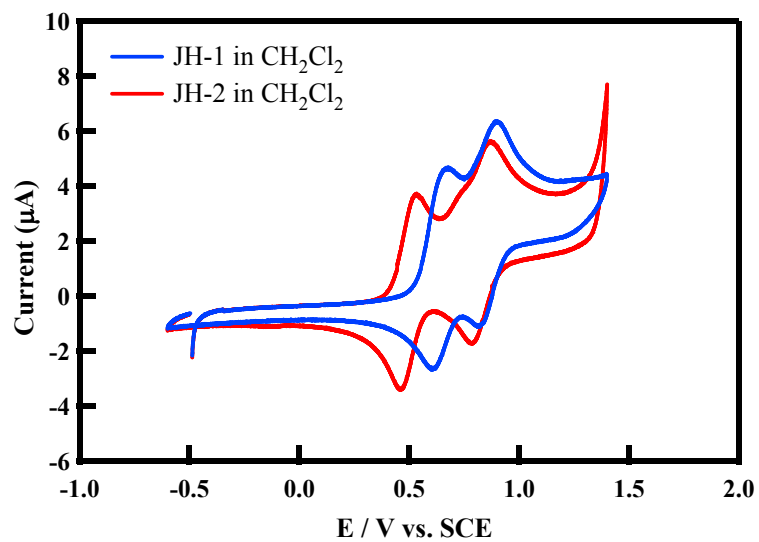

Cyclic voltammogram of JH-1 (from ref. [15]) and JH-2 sensitizers measured at a scan rate of 100 mV/s.

### SI 3. Molecules configuration and orientation

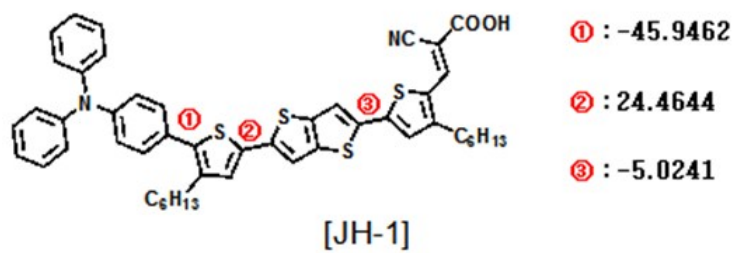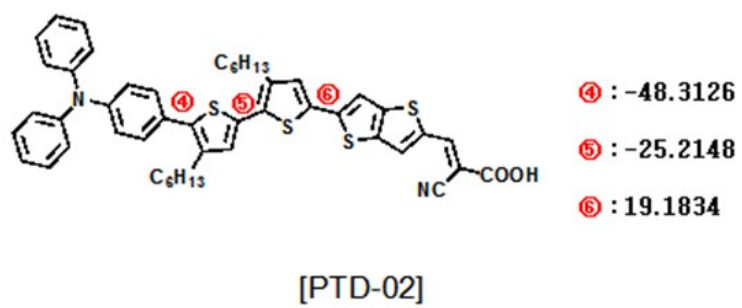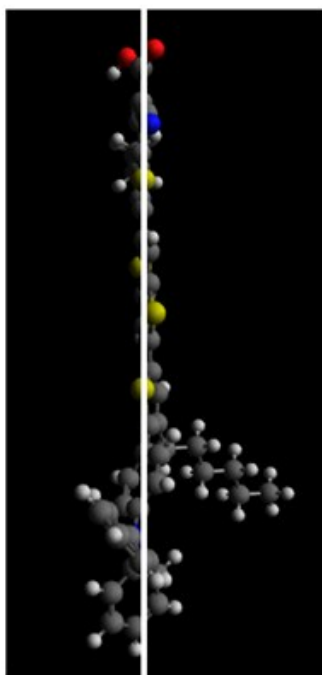

[JH-1]

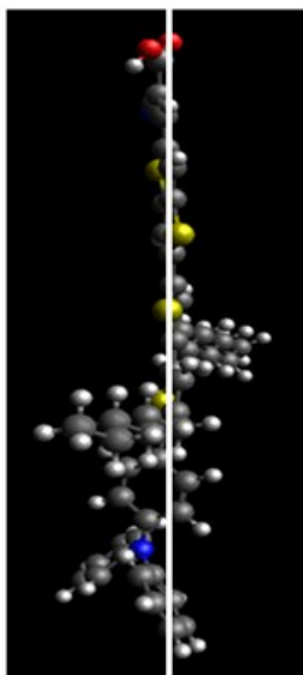

[PTD-02]

*SI 4. Scanning Electron Microscopy images of hierarchically structured (HS-) photoelectrodes (left) and its enlarged picture showing the nanocrystalline (nc-) TiO<sub>2</sub> aggregate (right)(See ref.18 for the details of HS-TiO<sub>2</sub> photoelectrode preparation)*

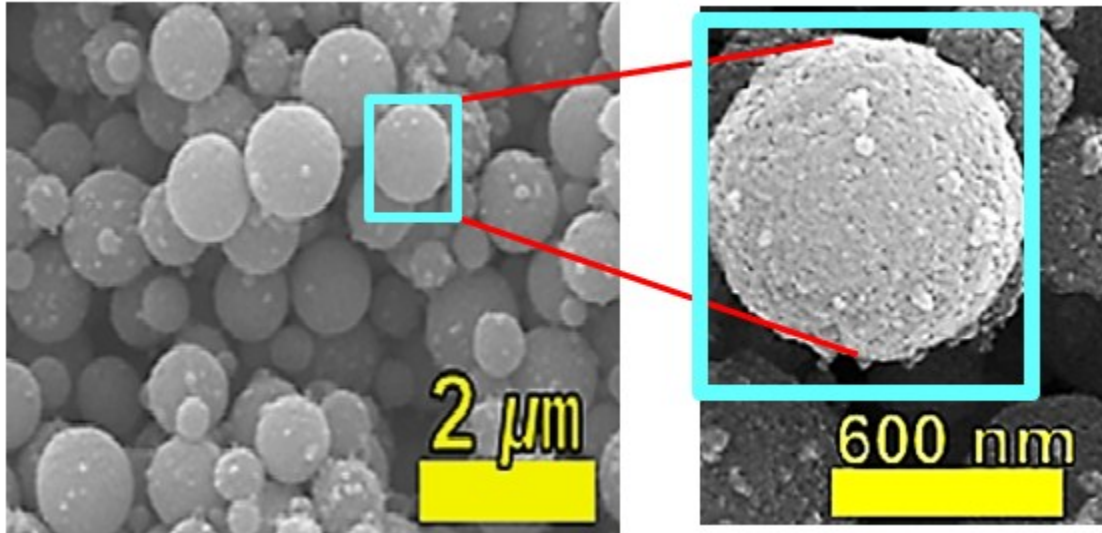

*SI 5. Schematic figure showing the size effect of HS TiO<sub>2</sub> and nanocrystalline(nc-) TiO<sub>2</sub> photoelectrodes.*

## Size effect

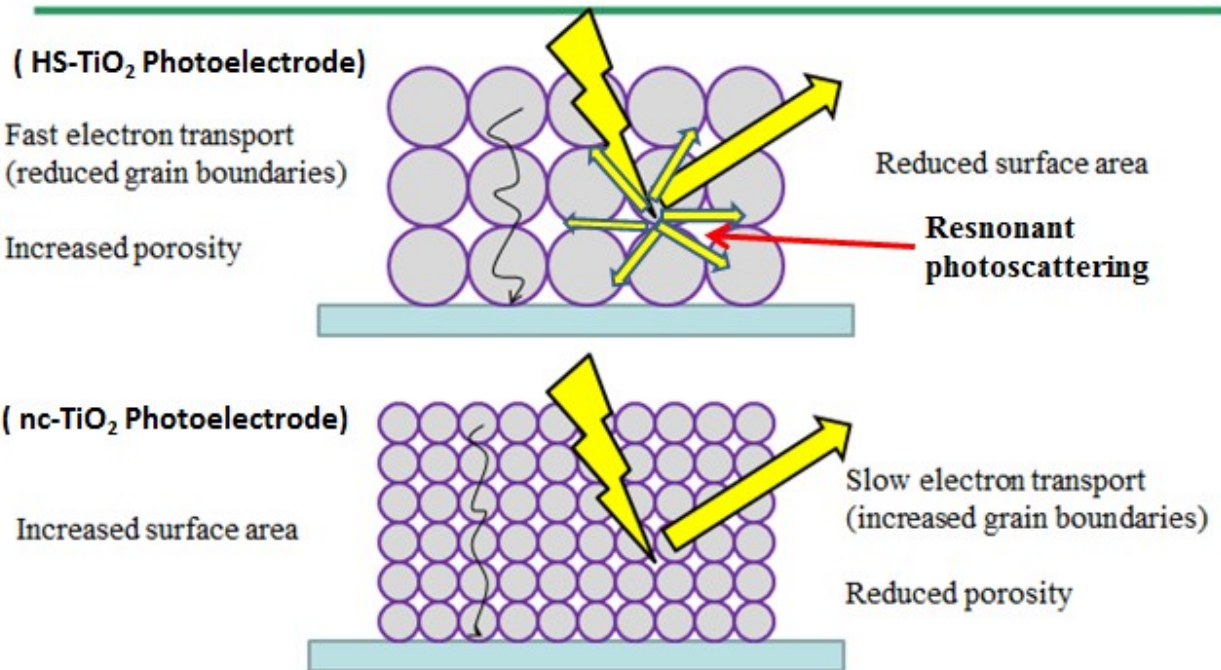

Supplement: c6ra06247d1.pdf [file c6ra06247d1.pdf]
